# Supplementary material
Source: PubMed Central journal article supplement (PMC1236546)

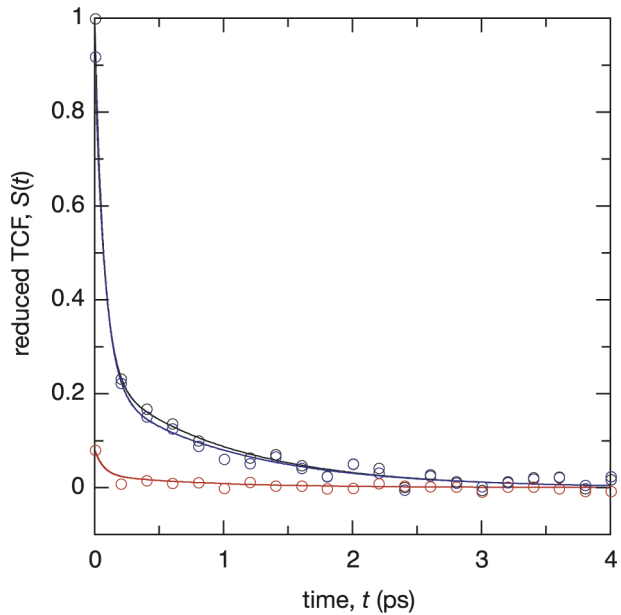

Supplement: pnas_0504181102_1.pdf [file pnas_0504181102_1.pdf]

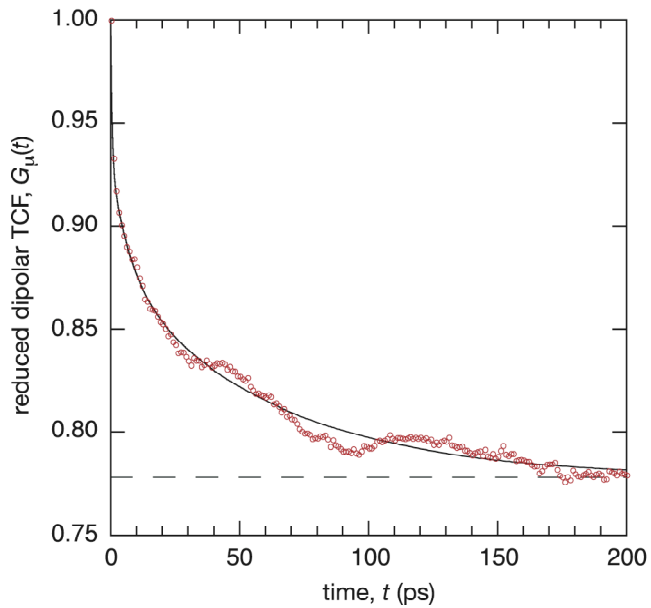

Supplement: pnas_0504181102_2.pdf [file pnas_0504181102_2.pdf]
